# Supplementary material
Source: publisher figshare collection journal article supplement (https://wiley.figshare.com/articles/dataset/_/3564621)
Supplement: Supplementary file 1 [file 1]

Appendix B.

TABLE B1. Selected species establishment probabilities (SEPs) by landtype from LINKAGES II for 223An Springfield Plateau ecological subsection for four climate change scenarios at year 2100.

|                   | PCM scenario at year 2100 |            |           |        |             |             | CGCM scenario at year 2100 |            |           |        |             |              |
|-------------------|---------------------------|------------|-----------|--------|-------------|-------------|----------------------------|------------|-----------|--------|-------------|--------------|
|                   | South-west                | North-east | Ridge top | Updain | Bottom land | Gentle slop | South-west                 | North-east | Ridge top | Updain | Bottom land | Gentle slope |
| White oak         | 0.25                      | 0.25       | 0.26      | 0.25   | 0.34        | 0.28        | 0.30                       | 0.31       | 0.31      | 0.30   | 0.40        | 0.32         |
| Red maple         | 0.05                      | 0.05       | 0.05      | 0.05   | 0.32        | 0.05        | 0.22                       | 0.25       | 0.24      | 0.22   | 0.48        | 0.28         |
| Chestnut oak      | 0.02                      | 0.02       | 0.02      | 0.02   | 0.11        | 0.02        | 0.01                       | 0.01       | 0.01      | 0.01   | 0.08        | 0.01         |
| Northern red oak  | 0.18                      | 0.18       | 0.18      | 0.18   | 0.24        | 0.19        | 0.09                       | 0.09       | 0.09      | 0.09   | 0.12        | 0.09         |
| Yellow poplar     | 0.08                      | 0.08       | 0.08      | 0.08   | 0.08        | 0.08        | 0.08                       | 0.08       | 0.08      | 0.08   | 0.34        | 0.08         |
| Sugar maple       | 0.00                      | 0.00       | 0.00      | 0.00   | 0.00        | 0.00        | 0.00                       | 0.00       | 0.00      | 0.00   | 0.00        | 0.00         |
| Black oak         | 0.02                      | 0.02       | 0.02      | 0.02   | 0.13        | 0.02        | 0.01                       | 0.01       | 0.01      | 0.01   | 0.08        | 0.01         |
| Post oak          | 0.03                      | 0.03       | 0.03      | 0.03   | 0.13        | 0.03        | 0.03                       | 0.03       | 0.03      | 0.03   | 0.22        | 0.05         |
| Black cherry      | 0.02                      | 0.02       | 0.02      | 0.02   | 0.10        | 0.02        | 0.02                       | 0.02       | 0.02      | 0.02   | 0.19        | 0.02         |
| Shortleaf pine    | 0.16                      | 0.17       | 0.17      | 0.16   | 0.25        | 0.18        | 0.21                       | 0.21       | 0.21      | 0.21   | 0.31        | 0.22         |
| American beech    | 0.00                      | 0.00       | 0.00      | 0.00   | 0.00        | 0.00        | 0.00                       | 0.00       | 0.00      | 0.00   | 0.00        | 0.00         |
| Scarlet oak       | 0.01                      | 0.01       | 0.01      | 0.01   | 0.05        | 0.01        | 0.00                       | 0.00       | 0.00      | 0.00   | 0.00        | 0.00         |
| Pignut hickory    | 0.02                      | 0.02       | 0.02      | 0.02   | 0.13        | 0.02        | 0.02                       | 0.02       | 0.02      | 0.02   | 0.23        | 0.02         |
| Loblolly pine     | 0.09                      | 0.09       | 0.09      | 0.09   | 0.51        | 0.17        | 0.35                       | 0.38       | 0.36      | 0.35   | 0.70        | 0.43         |
| Eastern redcedar  | 0.17                      | 0.17       | 0.18      | 0.17   | 0.24        | 0.19        | 0.20                       | 0.20       | 0.21      | 0.20   | 0.28        | 0.22         |
| Sweetgum          | 0.02                      | 0.02       | 0.02      | 0.02   | 0.02        | 0.02        | 0.02                       | 0.02       | 0.02      | 0.02   | 0.02        | 0.02         |
| Mockernut hickory | 0.02                      | 0.02       | 0.02      | 0.02   | 0.13        | 0.02        | 0.02                       | 0.02       | 0.02      | 0.02   | 0.24        | 0.02         |
| Shagbark hickory  | 0.02                      | 0.02       | 0.02      | 0.02   | 0.10        | 0.02        | 0.01                       | 0.01       | 0.01      | 0.01   | 0.06        | 0.01         |
| White ash         | 0.02                      | 0.02       | 0.02      | 0.03   | 0.02        | 0.02        | 0.01                       | 0.01       | 0.01      | 0.01   | 0.01        | 0.01         |
| Southern red oak  | 0.03                      | 0.03       | 0.03      | 0.03   | 0.18        | 0.03        | 0.03                       | 0.03       | 0.03      | 0.03   | 0.33        | 0.09         |

|                   | CGCM scenario at year 2100 |                |              |        |                |                | GFDL scenario at year 2100 |                |              |        |                |                |
|-------------------|----------------------------|----------------|--------------|--------|----------------|----------------|----------------------------|----------------|--------------|--------|----------------|----------------|
|                   | South-<br>west             | North-<br>east | Ridge<br>top | Updain | Bottom<br>land | Gentle<br>slop | South-<br>west             | North-<br>east | Ridge<br>top | Updain | Bottom<br>land | Gentle<br>slop |
| White oak         | 0.08                       | 0.08           | 0.08         | 0.08   | 0.11           | 0.08           | 0.00                       | 0.00           | 0.00         | 0.00   | 0.00           | 0.00           |
| Red maple         | 0.33                       | 0.34           | 0.33         | 0.33   | 0.56           | 0.38           | 0.06                       | 0.08           | 0.07         | 0.07   | 0.38           | 0.12           |
| Chestnut oak      | 0.00                       | 0.00           | 0.00         | 0.00   | 0.00           | 0.00           | 0.00                       | 0.00           | 0.00         | 0.00   | 0.00           | 0.00           |
| Northern red oak  | 0.00                       | 0.00           | 0.00         | 0.00   | 0.00           | 0.00           | 0.00                       | 0.00           | 0.00         | 0.00   | 0.00           | 0.00           |
| Yellow poplar     | 0.04                       | 0.04           | 0.04         | 0.04   | 0.29           | 0.04           | 0.01                       | 0.01           | 0.01         | 0.01   | 0.01           | 0.01           |
| Sugar maple       | 0.00                       | 0.00           | 0.00         | 0.00   | 0.00           | 0.00           | 0.00                       | 0.00           | 0.00         | 0.00   | 0.00           | 0.00           |
| Black oak         | 0.00                       | 0.00           | 0.00         | 0.00   | 0.00           | 0.00           | 0.00                       | 0.00           | 0.00         | 0.00   | 0.00           | 0.00           |
| Post oak          | 0.12                       | 0.13           | 0.12         | 0.12   | 0.30           | 0.14           | 0.03                       | 0.03           | 0.03         | 0.03   | 0.14           | 0.03           |
| Black cherry      | 0.01                       | 0.01           | 0.01         | 0.01   | 0.07           | 0.02           | 0.00                       | 0.00           | 0.00         | 0.00   | 0.00           | 0.00           |
| Shortleaf pine    | 0.07                       | 0.07           | 0.07         | 0.07   | 0.11           | 0.07           | 0.00                       | 0.00           | 0.00         | 0.00   | 0.00           | 0.00           |
| American beech    | 0.00                       | 0.00           | 0.00         | 0.00   | 0.00           | 0.00           | 0.00                       | 0.00           | 0.00         | 0.00   | 0.00           | 0.00           |
| Scarlet oak       | 0.00                       | 0.00           | 0.00         | 0.00   | 0.00           | 0.00           | 0.00                       | 0.00           | 0.00         | 0.00   | 0.00           | 0.00           |
| Pignut hickory    | 0.01                       | 0.01           | 0.01         | 0.01   | 0.08           | 0.02           | 0.00                       | 0.00           | 0.00         | 0.00   | 0.00           | 0.00           |
| Loblolly pine     | 0.56                       | 0.59           | 0.56         | 0.57   | 0.72           | 0.62           | 0.17                       | 0.18           | 0.18         | 0.17   | 0.62           | 0.21           |
| Eastern redcedar  | 0.22                       | 0.22           | 0.22         | 0.22   | 0.32           | 0.24           | 0.15                       | 0.15           | 0.15         | 0.15   | 0.21           | 0.16           |
| Sweetgum          | 0.02                       | 0.02           | 0.02         | 0.02   | 0.03           | 0.02           | 0.02                       | 0.02           | 0.02         | 0.02   | 0.02           | 0.02           |
| Mockernut hickory | 0.04                       | 0.05           | 0.04         | 0.04   | 0.25           | 0.09           | 0.01                       | 0.01           | 0.01         | 0.01   | 0.04           | 0.01           |
| Shagbark hickory  | 0.00                       | 0.00           | 0.00         | 0.00   | 0.00           | 0.00           | 0.00                       | 0.00           | 0.00         | 0.00   | 0.00           | 0.00           |
| White ash         | 0.00                       | 0.00           | 0.00         | 0.00   | 0.00           | 0.00           | 0.00                       | 0.00           | 0.00         | 0.00   | 0.00           | 0.00           |
| Southern red oak  | 0.15                       | 0.16           | 0.15         | 0.15   | 0.45           | 0.19           | 0.01                       | 0.01           | 0.01         | 0.01   | 0.10           | 0.02           |
